# Supplementary material for: Au nanochain-built 3D netlike porous films based on laser ablation in water and electrophoretic deposition
Source: Royal Society of Chemistry journal article supplement (doi:10.1039/c0cc00504e), 2010-01-01
Supplement: c0cc00504e.pdf [file c0cc00504e.pdf]

## Supporting information

### **Au Nanochain-built 3D Netlike Porous Films Based on Laser Ablation in Water and Electrophoretic Deposition**

Hui He, Weiping Cai\*, Yongxing Lin, and Bensong Chen.

*Key Laboratory of Materials Physics, Anhui Key Laboratory of Nanomaterials and Nanotechnology, Institute of Solid State Physics, Chinese Academy of Sciences, Hefei 230031, P. R. China*

### **Experimental Details**

Au colloidal solution was prepared by laser ablation of a gold metal target in deionized water, as previously described.<sup>[S1-2]</sup> A gold plate was fixed on a bracket in a glass vessel filled with 20 mL of deionized water and located 12mm below the water surface. Then it was irradiated or ablated for 60 min by the first harmonic of a Nd:YAG pulsed laser (wavelength 1064 nm, frequency 10 Hz, pulse duration 10 ns) with an energy of 90 mJ/pulse. The laser beam was focused on the plate with a spot size of about 2mm in diameter. The liquid phase was vigorously stirred with a magnetic stirrer during irradiation. After irradiation, we obtained the Au colloidal solution. Au content in the solution was estimated to be about 300 µg/L by measuring the laser ablation induced mass-loss of the gold target.

Two cleaned ITO substrates (35-50 Ω/sq) were used as cathode and anode electrodes, with a distance 3 cm between them and a working area of 1.5 cm × 1 cm, and immersed into the 20 mL Au colloidal solution. EPD was subsequently carried out at a DC voltage of 30 V for 3 h.

After EPD, the samples were rinsed softly by deionized water and dried in the air before structural characterization and morphological observation on field-emission scanning electron microscope (Sirion 200) and transmission electronic microscope (JEM-200CX). XRD

---

\* To whom all correspondence should be addressed  
E-mail: wpcai@issp.ac.cn

measurement was conducted on a Philips X'Pert with Cu K $\alpha$  radiation. Zeta potential was measured by using a Zetasizer 3000 (England, MALVERN). For SERS spectral examination, the samples were first dipped into a solution with 10<sup>-9</sup> M rhodamine 6G (R6G) for 3 h, rinsed with deionized water to remove unbound R6G molecules, and dried in the air. Raman spectral measurements were carried out on a French LABRAM-HR confocal laser microRaman spectrometer with an air-cooled Ar ion laser at 514.5 nm and a laser beam spot 2  $\mu$ m. Laser power was 10 mW. The integration time is 5 s for all spectra.

### Reference

- [S1] N. V. Tarasenko, A. V. Butsen, E. A. Nevar, N. A. Savastenko, *Appl. Surf. Sci.*, 2006, **252**, 4439.
- [S2] H. He, W. P. Cai, Y. X. Lin, B. S. Chen, *Langmuir.*, 2010 (Article), DOI: 10.1021/la904723a

**Fig. S1 Hui He et al**

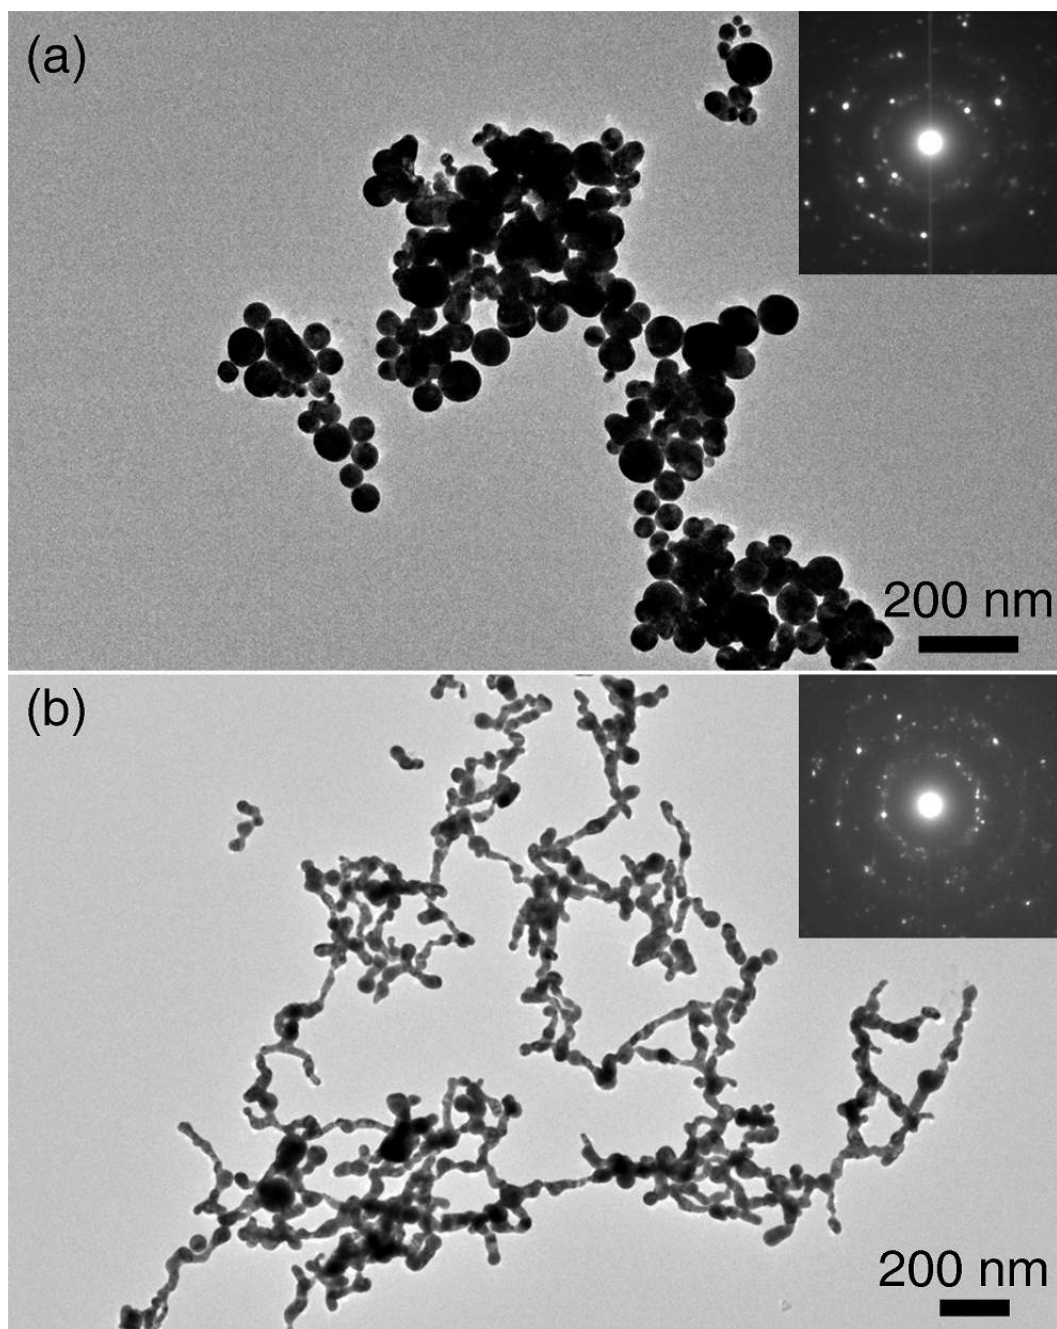

Fig. S1. TEM images (low magnification) of Au nanoparticles in the colloidal solution formed by laser ablation of Au target in water, for different times. (a): 20 min, (b): 60 min. Insets: the corresponding SAED patterns.

**Fig. S2 Hui He et al**

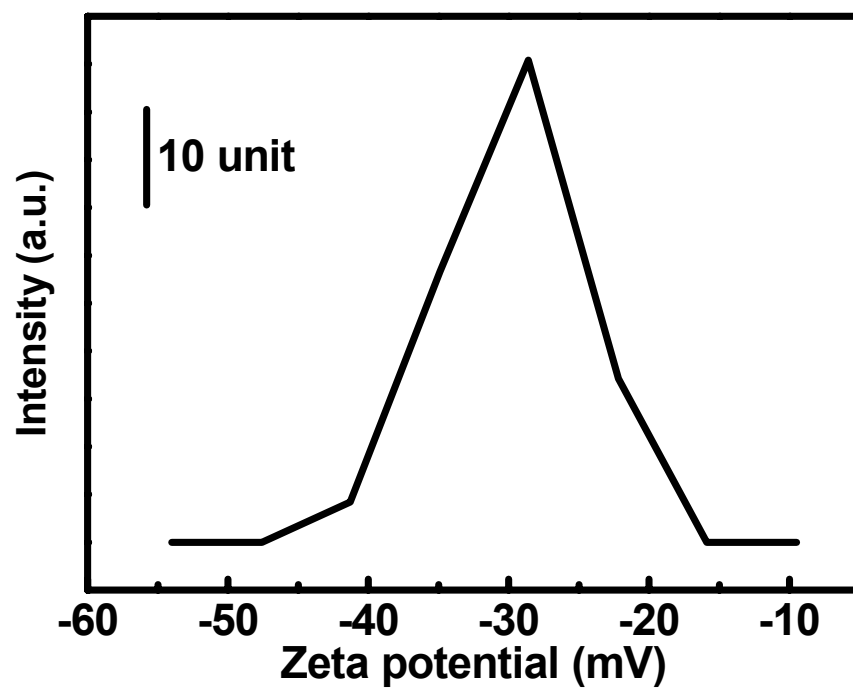

Fig. S2. The Zeta potential measurements for the Au colloidal solution formed by laser ablation of Au target in water, for 60 min.

**Fig. S3** Hui He et al

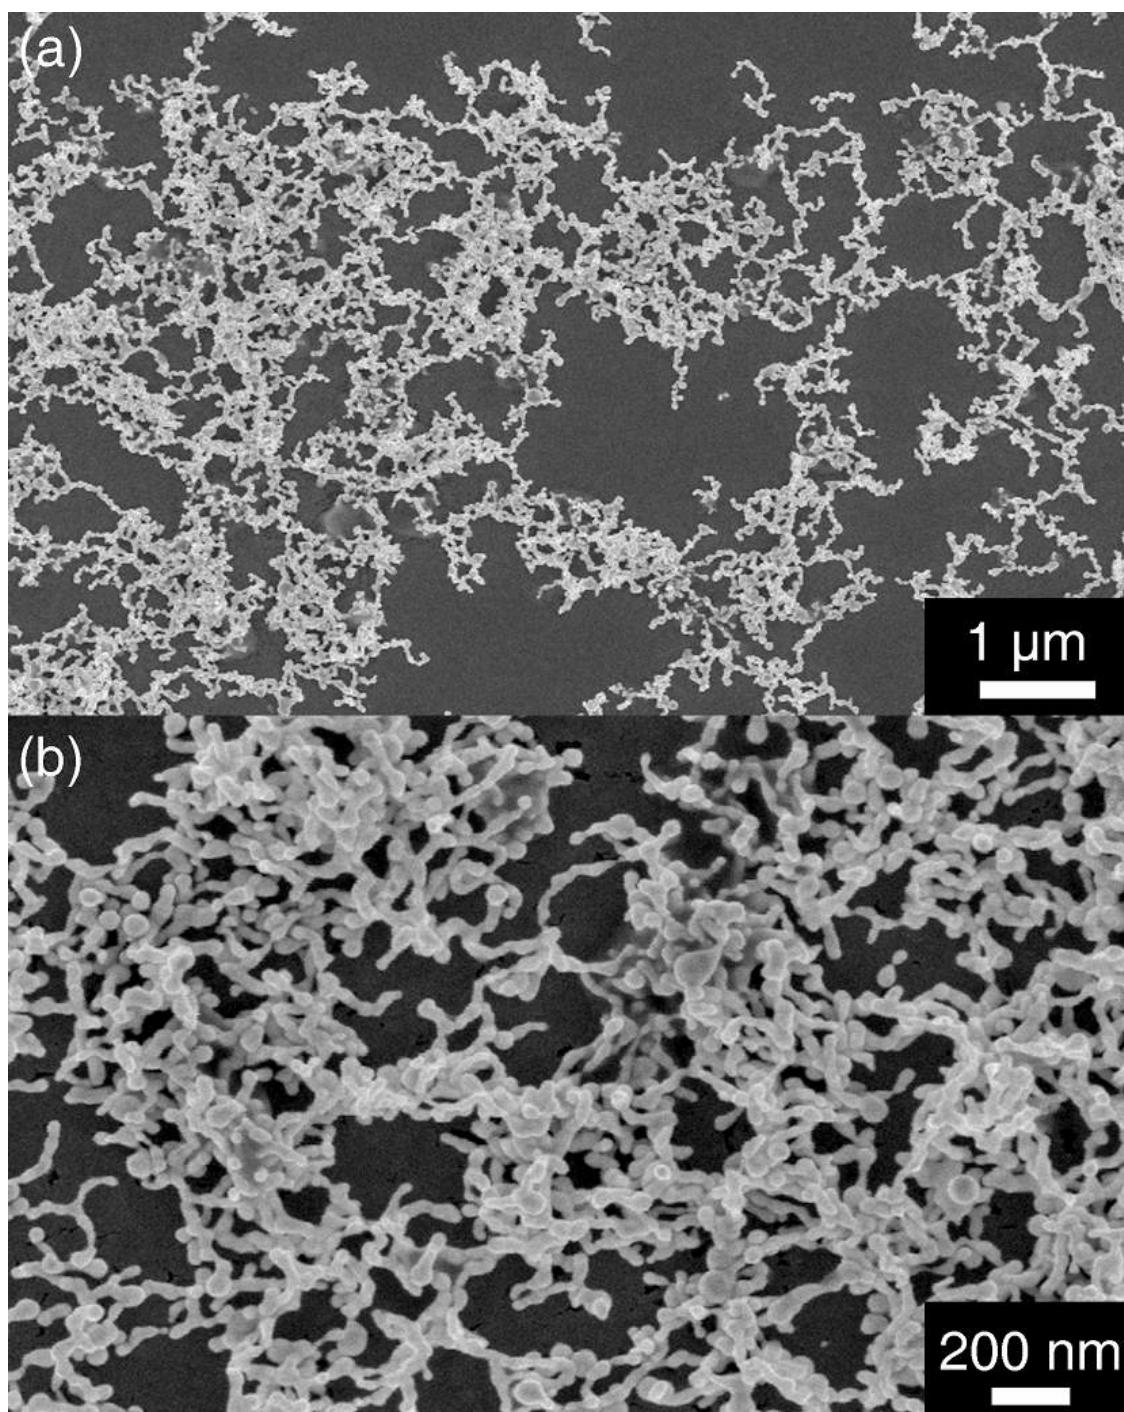

Fig. S3. Morphology of the film after EPD at 5 V in the Au colloidal solution shown in Fig.

1b. (a) Low magnification FESEM image , (b): high magnification FESEM image

**Fig. S4. Hui He et al**

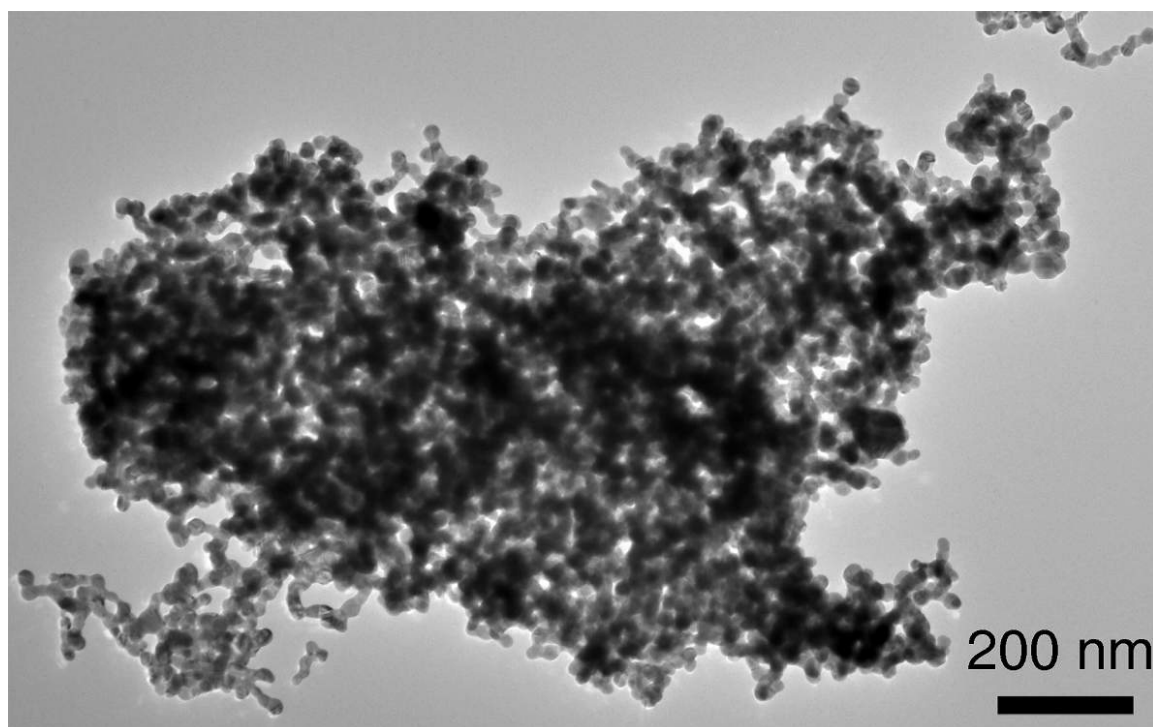

Fig. S4. TEM image of the product scraped from the sample shown in Fig. 3c. The morphology is similar to that shown in Fig. 2d.

**Fig. S5 Hui He et al**

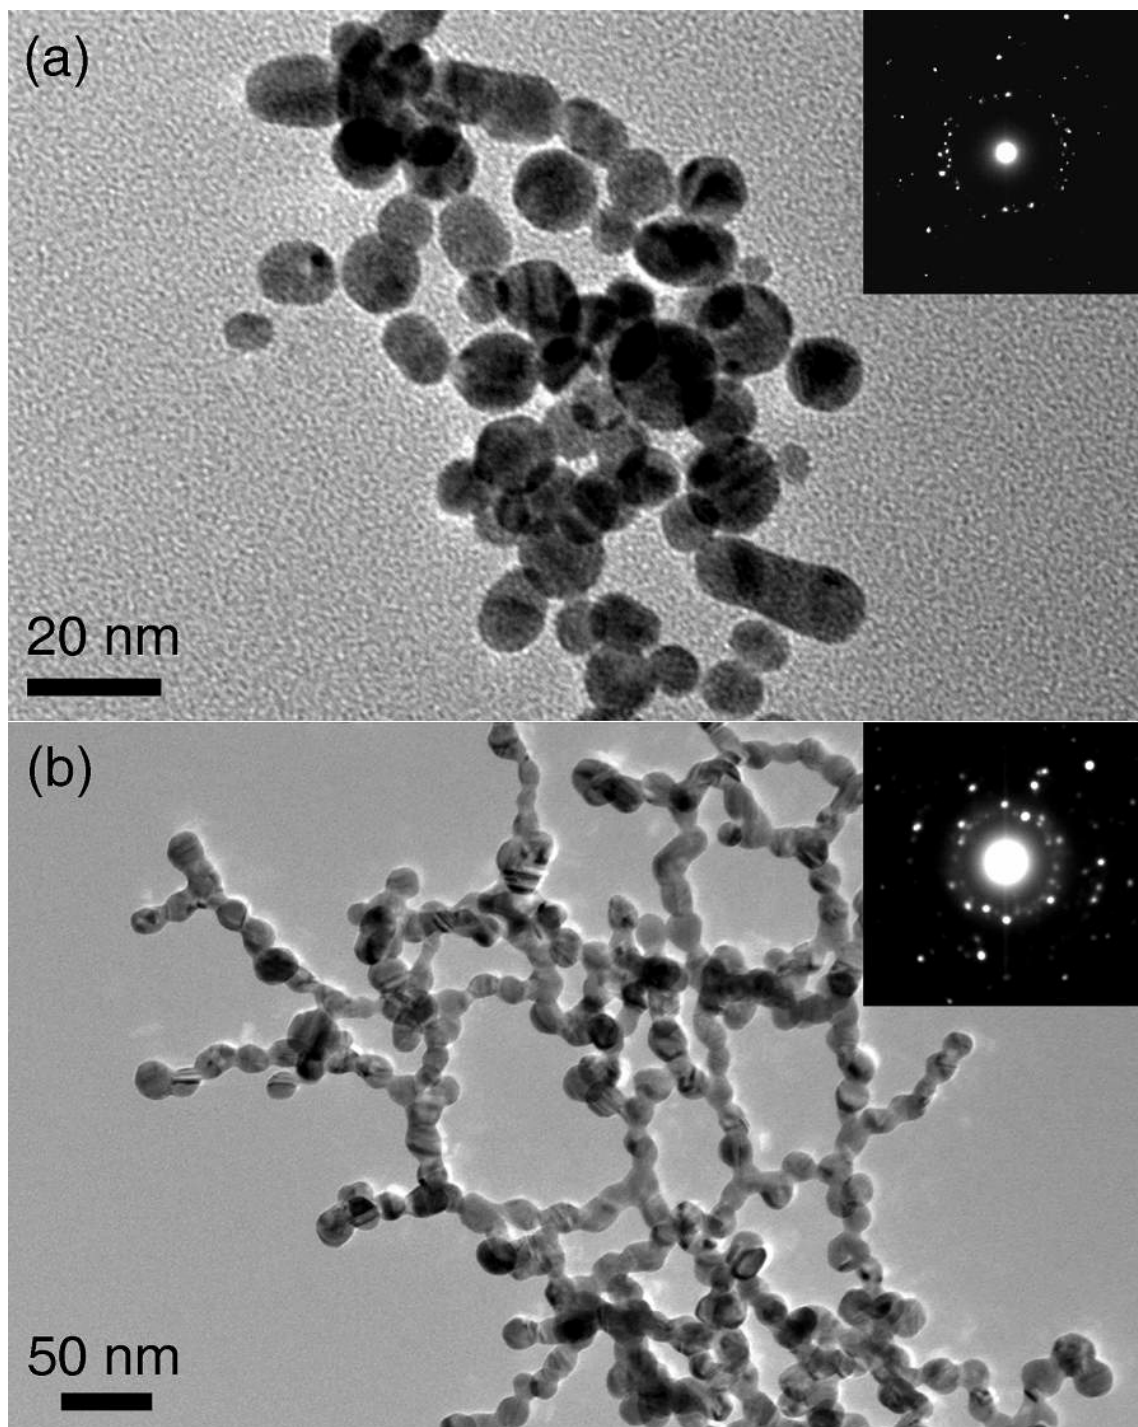

Fig. S5. TEM images of Au nanoparticles in the colloidal solution formed by additional laser irradiation, for 90 min, of the colloidal solutions shown in Fig. 1a (a) and b (b), respectively. Insets: the corresponding SAED patterns.



**Fig. S6 Hui He et al**

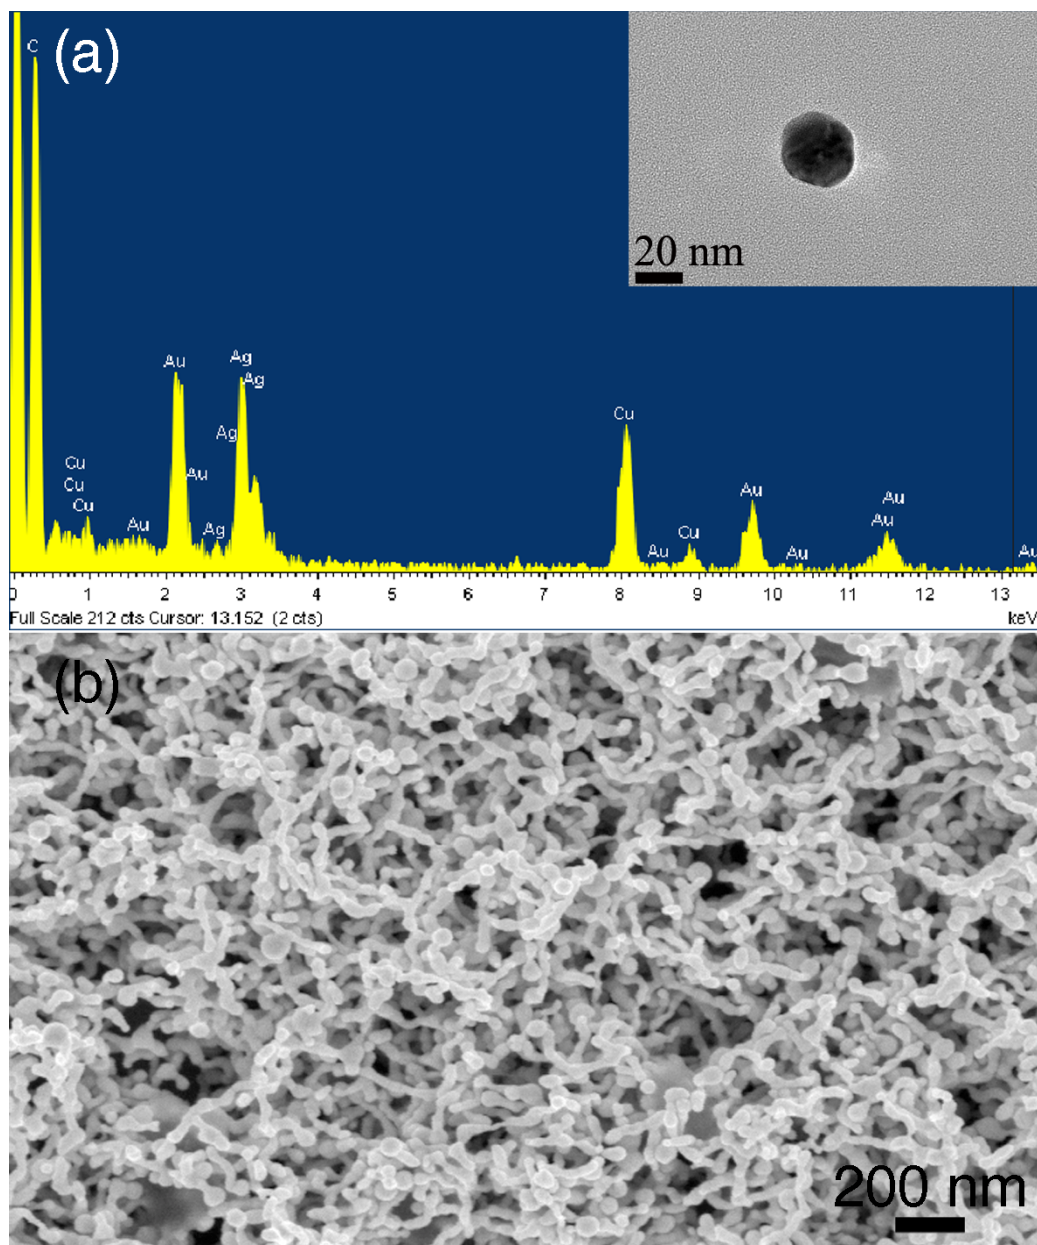

Fig. S6. Composition and morphology of  $\text{Au}_1\text{Ag}_1$  3D netlike film based on laser ablation of  $\text{Au}_1\text{Ag}_1$  target in water and EPD. (a) EDX spectrum. The inset: TEM image of the corresponding individual nanoparticle (Cu signal is from the copper grid). (b) FESEM image.
